# Supplementary material for: Theoretical study on the mechanism of a ring-opening reaction of oxirane by the active-site aspartic dyad of HIV-1 protease
Source: Royal Society of Chemistry journal article supplement (doi:10.1039/b715828a), 2007-12-10
Supplement: b715828a.pdf [file b715828a.pdf]

**Electronic Supplementary Information for:**

**Theoretical study on the mechanism of a ring-opening reaction of oxirane by active-site aspartic dyad of HIV-1 Protease**

Juraj Kóňa

International School for Advanced Studies (SISSA) and Democritos Modeling Center for Research in Atomistic Simulation (INFM), via Beirut 2-4, 34014 Trieste, Italy;  
Institute of Chemistry, Center for Glycomics, Slovak Academy of Sciences, Dúbravská cesta 9, SK-845 38 Bratislava, Slovak Republic

**Table 1S**

Total energies ( $E_0$ ),  $ZPE$ , thermal ( $G_{\text{gas}}$ ) and solvation ( $G_{\text{sol}}$ , aqueous solution) corrections to Gibbs free energies (in *a.u.*).

| Structure  | B3LYP          |             |                  |                  |
|------------|----------------|-------------|------------------|------------------|
|            | $E_0$          | $ZPE$       | $G_{\text{gas}}$ | $G_{\text{sol}}$ |
| <b>1A</b>  | -3156.81447509 | 0.967092158 | 0.861897523      | -0.1569086       |
| <b>TSA</b> | -3156.80016454 | 0.963562334 | 0.867462992      | -0.1529509       |
| <b>2A</b>  | -3156.85678871 | 0.970492901 | 0.869680532      | -0.1514033       |

  

|            | $E_0$ (MPW1K)  | $E_0$ (M05-2X) | $E_0$ (LMP2)   |
|------------|----------------|----------------|----------------|
| <b>1A</b>  | -3157.00201461 | -3156.41607400 | -3147.59590035 |
| <b>TSA</b> | -3156.98302742 | -3156.40294722 | -3147.57134124 |
| <b>2A</b>  | -3157.04917370 | -3156.46741768 | -3147.63631472 |

Gaussian inputs with Cartesian coordinates of the B3LYP optimized structures from the  
reaction path **1A** → **TSA** → **2A**:

# b3lyp/6-31+G(d,p) opt=(modredundant) freq=normal

Starting complex **1A**

```
-1 1
C      0.00000000  0.00000000  0.00000000
H      1.09390000  0.00000000  0.00000000
C     -0.49409634  1.43903824  0.00000000
O     -0.09502247  2.26170308 -0.82002307
N     -1.44536627  1.73243597  0.94587607
H     -1.62604852  1.06950761  1.68872297
C     -2.06212566  3.04824368  1.08470682
H     -1.73090504  3.63302912  0.22427313
C     -3.58921638  2.87605109  1.05801142
H     -3.88160133  2.40087659  0.11720396
H     -3.89169882  2.19233359  1.86105724
C     -4.40374508  4.14171084  1.23940714
O     -3.94126319  5.20911907  1.62711398
O     -5.67995999  3.94667079  0.95915706
C     -1.56973123  3.67367603  2.40501776
O     -1.78205515  3.10377167  3.48368103
N     -0.88744007  4.83111244  2.28864894
H     -0.87647318  5.30644478  1.39495426
C     -0.29288092  5.56585030  3.39511481
H      0.31421246  4.87860650  3.99302926
C      0.63101934  6.66921176  2.79815101
H      0.79371609  7.41447896  3.58344943
C      1.97199452  6.10713302  2.33038630
H      1.83575130  5.34021865  1.56091496
H      2.57996425  6.90832771  1.90094382
H      2.51620949  5.66547396  3.17247104
O     -0.03449256  7.28287819  1.68355860
H     -0.32445450  8.19691111  1.91001386
C     -1.28336365  6.16372931  4.41152253
O     -0.85007000  6.57089664  5.49009100
N     -2.59239412  6.19465544  4.05715684
H     -2.87335472  5.88425842  3.13044197
C     -3.62096444  6.63782873  4.97115896
H     -3.13533604  7.13771761  5.81417415
H     -4.28205001  7.36498428  4.48934891
C     -4.52403442  5.54153848  5.54262490
O     -5.52411279  5.87399462  6.19866615
N     -4.19038471  4.25287606  5.31426686
H     -3.33064805  4.03403544  4.81498171
C     -5.04478734  3.13922605  5.75160866
H     -6.07547686  3.50736951  5.69173622
C     -4.86786610  1.93268480  4.83653366
H     -3.82718350  1.59860434  4.82111956
H     -5.48075932  1.10274627  5.19677771
H     -5.18307954  2.18772697  3.82034038
C     -4.77547110  2.77020611  7.23411489
O     -4.27218423  1.69866481  7.57191480
N     -5.17202434  3.71833167  8.11918729
H     -5.50140465  4.60504747  7.74185154
C     -4.94756024  3.56562871  9.54568372
H     -3.88184802  3.62689572  9.79892715
C     -0.09191821  12.16174465  1.85001165
H     -0.37127277  12.47665247  2.85956231
C     -0.83878599  10.87804341  1.52643841
O     -0.67905218  9.86587145  2.23038393
N     -1.68443995  10.93426631  0.47781014
H     -1.67088990  11.75750139 -0.11130289
C     -2.55717252  9.84374670  0.02179772
H     -2.58749378  9.10794277  0.82756677
C     -3.96241289  10.41377932 -0.23711708
H     -4.26588830  11.01138383  0.62714632
H     -3.91368150  11.09099889 -1.09976634
C     -5.08680436  9.39506647 -0.52705850
O     -4.73951008  8.23978791 -0.96210781
O     -6.25364125  9.78557580 -0.33466490
C     -1.93117220  9.25036771 -1.25555527
O     -1.69999406  9.97175646 -2.22676062
```

|   |             |             |             |
|---|-------------|-------------|-------------|
| N | -1.63457598 | 7.92740759  | -1.19849206 |
| H | -1.91682789 | 7.42895388  | -0.36639724 |
| C | -1.10726912 | 7.16402522  | -2.31839532 |
| H | -0.85236405 | 7.89522382  | -3.09062130 |
| C | 0.19651979  | 6.39244821  | -1.90682588 |
| H | -0.10240653 | 5.48607298  | -1.35429096 |
| C | 1.03302315  | 5.97480703  | -3.10906004 |
| H | 1.38221477  | 6.87054314  | -3.63780373 |
| H | 1.90826072  | 5.41594880  | -2.76106621 |
| H | 0.44864219  | 5.35781963  | -3.79388074 |
| O | 1.03775500  | 7.20434826  | -1.09561036 |
| H | 0.64697917  | 7.31403128  | -0.20954657 |
| C | -2.15834085 | 6.19553944  | -2.91458779 |
| O | -1.85701346 | 5.43173499  | -3.83294620 |
| N | -3.38377289 | 6.21311551  | -2.32477475 |
| H | -3.64278028 | 6.98852931  | -1.70948064 |
| C | -4.43730885 | 5.30698909  | -2.75201160 |
| H | -3.98339799 | 4.49359713  | -3.31829462 |
| H | -4.93394600 | 4.89317616  | -1.86435512 |
| C | -5.52986257 | 5.90476185  | -3.65293917 |
| O | -5.93398527 | 5.25656687  | -4.63493353 |
| N | -6.04225001 | 7.10455881  | -3.30433260 |
| H | -5.66992458 | 7.60277198  | -2.48307172 |
| C | -7.14617955 | 7.72190608  | -4.05635267 |
| H | -7.75624257 | 6.89362470  | -4.43881745 |
| C | -7.98941292 | 8.61608310  | -3.15170571 |
| H | -7.39115444 | 9.39082228  | -2.66560242 |
| H | -8.76876690 | 9.10723456  | -3.74087451 |
| H | -8.46234596 | 8.01227513  | -2.36934414 |
| C | -6.60560725 | 8.49098032  | -5.29176845 |
| O | -6.70811975 | 9.71178602  | -5.42476445 |
| N | -6.02003136 | 7.69389068  | -6.22435483 |
| H | -5.93020264 | 6.70236130  | -6.00765802 |
| C | -5.33442312 | 8.25113748  | -7.37750470 |
| H | -4.98857384 | 7.42945283  | -8.00968587 |
| H | -5.48415483 | 4.35842412  | 10.07187708 |
| H | -5.31691335 | 2.59324925  | 9.88399558  |
| H | -0.33100251 | -0.47591563 | -0.93002068 |
| H | -0.36212332 | -0.58679453 | 0.84933791  |
| H | -6.00878161 | 8.89086491  | -7.95649818 |
| H | -4.47089538 | 8.85861714  | -7.07931563 |
| H | 0.98131773  | 11.95377920 | 1.85111156  |
| H | -0.30169727 | 12.97539746 | 1.15022304  |
| H | -6.25068922 | 4.76300135  | 1.16349693  |
| C | -7.30670734 | 7.17754795  | 0.85995396  |
| C | -6.87128175 | 7.05313627  | 2.25236480  |
| H | -6.55694026 | 7.29702299  | 0.08246317  |
| H | -5.80531814 | 7.06189160  | 2.46602054  |
| O | -7.31845991 | 5.87208921  | 1.53135359  |
| H | -8.30205426 | 7.55711373  | 0.64466682  |
| H | -7.53164203 | 7.34176511  | 3.06678112  |

1 F  
50 F  
52 F  
101 F

# b3lyp/6-31+G(d,p) opt=(modredundant,calcfc,noeigentest) freq=noraman

Transition state **TSA**

```
-1 1
C      0.00000000  0.00000000  0.00000000
H      1.09400000  0.00000000  0.00000000
C     -0.61062833  1.39435500  0.00000000
O     -1.82686788  1.57098233  0.01584212
N      0.28709715  2.42530348  0.01402135
H      1.26117218  2.22118945 -0.15982166
C     -0.10132540  3.83456550 -0.00210626
H     -1.08298863  3.89778219  0.47202975
C      0.93667938  4.63156886  0.79666401
H      0.98888550  4.23715082  1.81650568
H      1.92862485  4.48758993  0.35211200
C      0.69227234  6.13819512  0.87241189
O     -0.22222565  6.67097601  0.21317175
O      1.51092830  6.75497785  1.65104230
C     -0.18279592  4.31436435 -1.46466210
O      0.82946286  4.35464196 -2.17520319
N     -1.41239625  4.65081693 -1.91407901
H     -2.17783305  4.68891063 -1.25500995
C     -1.67853901  5.08832012 -3.27427405
H     -1.14674907  4.41934163 -3.95920491
C     -3.19319463  4.98290921 -3.57182191
H     -3.36591415  5.51907717 -4.50977004
C     -3.66056000  3.53512173 -3.70300892
H     -3.47705642  2.96913632 -2.78424011
H     -4.73344943  3.50710501 -3.91192727
H     -3.13310261  3.03804627 -4.52448621
O     -3.93485868  5.62566647 -2.51397194
H     -4.36482012  6.44697353 -2.84715339
C     -1.13265211  6.48310224 -3.63870866
O     -1.17497842  6.84045560 -4.81698327
N     -0.59823441  7.22567541 -2.63771415
H     -0.62720925  6.89549360 -1.67243451
C      0.08672480  8.47119731 -2.90579684
H     -0.14981648  8.77890381 -3.92778078
H     -0.26342596  9.25840480 -2.23111817
C      1.61300090  8.43376752 -2.78010717
O      2.24325035  9.50080333 -2.86247350
N      2.21383444  7.23965398 -2.58790375
H      1.65662302  6.38772418 -2.57182087
C      3.66066581  7.12568757 -2.35113189
H      3.95292577  8.04089133 -1.82389096
C      3.97404318  5.90843325 -1.48935318
H      3.61357835  4.99010220 -1.95963351
H      5.05520811  5.81683868 -1.36188134
H      3.51076547  6.02300881 -0.50571143
C      4.44615694  7.09821304 -3.68730886
O      5.06081695  6.10659072 -4.08191855
N      4.41868289  8.27334569 -4.36516285
H      3.81606993  9.01027120 -4.00302935
C      5.04820688  8.41025661 -5.66574614
H      4.52475465  7.82861178 -6.43485920
C     -7.27747203  9.22663075 -3.63745309
H     -7.87269746  9.95489209 -3.08068464
C     -6.11681576  8.65980533 -2.83887189
O     -5.34427796  7.83401547 -3.35032636
N     -5.97693483  9.13641092 -1.58077523
H     -6.73325048  9.68242789 -1.18964309
C     -4.95914068  8.69176030 -0.62470455
H     -4.15704151  8.23533240 -1.20846348
C     -4.41937468  9.91287099  0.14144547
H     -4.14106873  10.69135648 -0.57304696
H     -5.21889363  10.30098432  0.78605535
C     -3.21081363  9.59029431  1.03441025
O     -3.26599761  8.53431566  1.72964695
O     -2.25232675  10.41431429  1.01214805
C     -5.62440335  7.66289523  0.31519751
O     -6.60478623  7.98470219  0.98393202
N     -5.08442328  6.41829063  0.29156444
H     -4.31979593  6.24944098 -0.35030086
C     -5.59116512  5.30429226  1.07977940
```

|   |             |             |             |
|---|-------------|-------------|-------------|
| H | -6.61550694 | 5.55687474  | 1.36691958  |
| C | -5.61050451 | 3.99854868  | 0.21222160  |
| H | -4.57384783 | 3.63352025  | 0.12376863  |
| C | -6.47282323 | 2.90073459  | 0.82185553  |
| H | -7.51838107 | 3.22799102  | 0.84398427  |
| H | -6.40532435 | 2.00504835  | 0.19715971  |
| H | -6.15526690 | 2.66892201  | 1.83869227  |
| O | -6.13699320 | 4.26263200  | -1.08458223 |
| H | -5.46515193 | 4.71874114  | -1.62133295 |
| C | -4.79112485 | 5.08715205  | 2.38639046  |
| O | -5.16207666 | 4.26300652  | 3.22291371  |
| N | -3.64319520 | 5.80967738  | 2.50991641  |
| H | -3.50450163 | 6.62442155  | 1.91400261  |
| C | -2.78595511 | 5.65559346  | 3.67043291  |
| H | -2.89162965 | 4.64009771  | 4.05271204  |
| H | -1.74557520 | 5.81088646  | 3.36055343  |
| C | -3.05568310 | 6.58948970  | 4.85945194  |
| O | -2.87895754 | 6.17379883  | 6.01661659  |
| N | -3.44085050 | 7.85326088  | 4.58337483  |
| H | -3.51890299 | 8.15575414  | 3.60892703  |
| C | -3.62706560 | 8.86059367  | 5.63611972  |
| H | -2.89375984 | 8.63274641  | 6.41926627  |
| C | -3.38557161 | 10.26087379 | 5.08330300  |
| H | -4.10432185 | 10.50431177 | 4.29709099  |
| H | -3.50599012 | 11.00085625 | 5.87796116  |
| H | -2.37351549 | 10.33562296 | 4.67572979  |
| C | -5.03504636 | 8.73938957  | 6.27768323  |
| O | -5.87669260 | 9.63651760  | 6.20973534  |
| N | -5.24662566 | 7.56958295  | 6.93041987  |
| H | -4.51388597 | 6.86414436  | 6.88159543  |
| C | -6.54990894 | 7.22579565  | 7.47038930  |
| H | -7.29644178 | 7.10629984  | 6.67607133  |
| H | 5.03977876  | 9.46469813  | -5.95108771 |
| H | 6.08212221  | 8.05573823  | -5.62410182 |
| H | -0.35935375 | -0.54224279 | -0.87933843 |
| H | -0.35700883 | -0.53296030 | 0.88594382  |
| H | -6.46339922 | 6.28603831  | 8.01998425  |
| H | -6.90247870 | 8.00919249  | 8.14823623  |
| H | -6.87964053 | 9.70131632  | -4.53912982 |
| H | -7.92142873 | 8.40082430  | -3.95365029 |
| H | 1.35210235  | 7.97913842  | 1.80350100  |
| C | -0.44995978 | 9.58368226  | 1.89972889  |
| C | 0.61046755  | 9.82474377  | 0.93865922  |
| H | -0.97343422 | 8.64025942  | 1.88673394  |
| H | 0.57523837  | 9.25567344  | 0.01178431  |
| O | 1.25897043  | 9.13178435  | 2.02380453  |
| H | -0.58145085 | 10.26203144 | 2.72780783  |
| H | 0.98142375  | 10.84059053 | 0.81243596  |

1 F  
50 F  
52 F  
101 F

# b3lyp/6-31+G(d,p) opt=(modredundant) freq

covalent intermediate **2A**

-1 1  
C 0.00000000 0.00000000 0.00000000  
H 1.09410000 0.00000000 0.00000000  
C -0.61029556 1.39624703 0.00000000  
O -1.82908774 1.56358163 -0.06420556  
N 0.28083716 2.42132373 0.08925068  
H 1.27444088 2.23258825 0.08147056  
C -0.09048789 3.83532639 0.15218779  
H -1.15188665 3.89327825 -0.10006309  
C 0.14611205 4.37146265 1.58259893  
H -0.32502319 3.68070240 2.28560648  
H 1.22613242 4.36864465 1.77991201  
C -0.37739184 5.78761320 1.86501230  
O -0.20301879 6.66790768 0.95565130  
O -0.92328974 5.98655788 2.97459454  
C 0.77710018 4.54122850 -0.90173222  
O 1.99512188 4.35267127 -0.92219245  
N 0.12518896 5.30439797 -1.82402594  
H -0.85783524 5.49997845 -1.67170345  
C 0.84393543 6.08303510 -2.82211924  
H 1.90614454 5.88219359 -2.63502863  
C 0.55382264 5.63734764 -4.27079570  
H 1.09218400 6.33081014 -4.92256281  
C 1.00214529 4.20501977 -4.53598334  
H 0.45920221 3.50003161 -3.89852458  
H 0.81627746 3.94070032 -5.58106974  
H 2.07125505 4.09107170 -4.33063166  
O -0.85770070 5.73469583 -4.58108179  
H -1.04044798 6.54234492 -5.10558004  
C 0.67314593 7.61103481 -2.64485354  
O 0.80368730 8.36586088 -3.61344765  
N 0.44272796 8.02571334 -1.37614573  
H 0.26976013 7.33461617 -0.63725210  
C 0.33246767 9.43886927 -1.04464082  
H 0.66925900 10.01637208 -1.90453543  
H -0.71717715 9.70413264 -0.84498631  
C 1.14968319 9.91421161 0.16771523  
O 1.75896823 10.99672002 0.09539805  
N 1.10602197 9.16803866 1.28914954  
H 0.60187020 8.26848693 1.29248510  
C 1.69303502 9.62800811 2.55790667  
H 1.58733299 10.71956397 2.56706043  
C 0.95106876 9.02010290 3.74334218  
H 1.02725253 7.93077422 3.74814476  
H 1.38782275 9.38619346 4.67612901  
H -0.10748835 9.29097217 3.71621881  
C 3.21125185 9.31997166 2.62012674  
O 3.70003647 8.51055469 3.40866160  
N 3.96114081 10.04355630 1.74856833  
H 3.46754937 10.62264394 1.07214198  
C 5.39153389 9.82718640 1.63142882  
H 5.62082127 8.82938914 1.23714930  
C -3.53676385 9.37881280 -7.13157506  
H -4.40954763 9.98441475 -6.87439079  
C -3.02415737 8.53433519 -5.97518889  
O -2.00253810 7.85175365 -6.08761201  
N -3.75270432 8.59801217 -4.82109172  
H -4.67044654 9.02129327 -4.86487396  
C -3.49141179 7.73206250 -3.67210143  
H -2.43936074 7.45625454 -3.71626931  
C -3.76640755 8.48203690 -2.36565762  
H -3.15100618 9.38677138 -2.31875665  
H -4.81374970 8.80011946 -2.31835783  
C -3.48193103 7.63234432 -1.13798029  
O -3.07854521 6.47712664 -1.18694095  
O -3.74016691 8.30361016 -0.01958031  
C -4.38625077 6.48054124 -3.79347945  
O -5.61788282 6.58487602 -3.72043169  
N -3.73052293 5.32326132 -3.99217573  
H -2.71410096 5.36765601 -4.01725130  
C -4.38449383 4.04460704 -4.25478817

|   |              |             |             |
|---|--------------|-------------|-------------|
| H | -5.04686312  | 4.14657162  | -5.12050012 |
| C | -3.27856099  | 3.00036189  | -4.59948627 |
| H | -2.63871395  | 2.88365999  | -3.71063398 |
| C | -3.84532693  | 1.64304686  | -4.99368434 |
| H | -4.45631992  | 1.73922682  | -5.89690362 |
| H | -3.01501306  | 0.96476367  | -5.20925744 |
| H | -4.46540028  | 1.21808490  | -4.20285214 |
| O | -2.49754184  | 3.45846032  | -5.70255894 |
| H | -1.86836946  | 4.14556370  | -5.41984352 |
| C | -5.28821287  | 3.57988387  | -3.09514172 |
| O | -6.22415975  | 2.81166733  | -3.30791189 |
| N | -4.97211830  | 4.04638352  | -1.85528935 |
| H | -4.19587832  | 4.68968715  | -1.74569582 |
| C | -5.72948989  | 3.67130983  | -0.67928287 |
| H | -6.22335400  | 2.71616014  | -0.87533464 |
| H | -5.05329464  | 3.53000481  | 0.16838165  |
| C | -6.81563453  | 4.65012533  | -0.22186180 |
| O | -7.40203552  | 4.43236961  | 0.84926306  |
| N | -7.09359415  | 5.71624820  | -1.00649371 |
| H | -6.63903312  | 5.81023888  | -1.91239682 |
| C | -8.05378947  | 6.75209025  | -0.59911651 |
| H | -7.96977712  | 6.82920652  | 0.49093441  |
| C | -7.70548004  | 8.08924440  | -1.24340254 |
| H | -7.71636997  | 8.01493267  | -2.33351834 |
| H | -8.44042355  | 8.84332378  | -0.95261037 |
| H | -6.71560573  | 8.41484343  | -0.91028074 |
| C | -9.51732509  | 6.34029112  | -0.91235804 |
| O | -10.20371385 | 6.91840857  | -1.75629422 |
| N | -9.97986810  | 5.31978551  | -0.14840158 |
| H | -9.31069005  | 4.84835828  | 0.45815471  |
| C | -11.31546095 | 4.77851242  | -0.33157493 |
| H | -11.40941545 | 4.24032342  | -1.28285520 |
| H | 5.80659670   | 10.58021046 | 0.95729797  |
| H | 5.87157149   | 9.91656728  | 2.61074871  |
| H | -0.36051672  | -0.54170991 | -0.87881757 |
| H | -0.35617156  | -0.53368221 | 0.88609318  |
| H | -11.53023048 | 4.09046053  | 0.48900991  |
| H | -12.05280228 | 5.58628701  | -0.32880740 |
| H | -2.72882785  | 10.03391522 | -7.46732682 |
| H | -3.79216159  | 8.71331929  | -7.96120679 |
| H | -1.94692574  | 7.35612162  | 3.35204057  |
| C | -3.50924809  | 7.65042423  | 1.27238743  |
| C | -2.84741415  | 8.66426282  | 2.20371088  |
| H | -2.86614419  | 6.78587487  | 1.12166990  |
| H | -1.91977140  | 9.01992918  | 1.73033932  |
| O | -2.60872186  | 8.08597829  | 3.46779524  |
| H | -4.48487716  | 7.33646231  | 1.65301943  |
| H | -3.50709742  | 9.52734825  | 2.35053037  |

1 F  
50 F  
52 F  
101 F

A Jaguar input with Cartesian coordinates of the **TSA** transition state optimized at the M05-2X/6-31+G(d,p) level.

```
&gen
iguess=1
maxitg=300
basis=6-31g**+
ip11=2
maxit=100
igeopt=2
molchg=-1
dftname=m05-2x
ip24=2
itrvec= -2
&
&zmat
C1      -2.1343999971#      1.0193000042#      6.6135999792#
H2      -3.0204694744      0.4169256783      6.8109005515
C3      -1.5919402695      0.8437310853      5.1964672011
O4      -0.5818466646      1.4272185916      4.8145527353
N5      -2.2812508128      -0.0213628150      4.4031272910
H6      -3.1719725652      -0.3673997202      4.7198225954
C7      -1.8969349954      -0.3479588820      3.0304230348
H8      -0.8122315039      -0.2657999781      2.9692437902
C9      -2.3544681538      -1.7735745603      2.7306739554
H10     -1.8981042235      -2.4680523324      3.4365115792
H11     -3.4402257937      -1.8357550177      2.8528661915
C12     -2.0423830261      -2.2306025494      1.3111508747
O13     -1.7213192429      -1.3801169808      0.4596461720
O14     -2.1628381227      -3.4863129664      1.1063454883
C15     -2.5595818620      0.6539328252      2.0746887571
O16     -3.7818606184      0.6510391671      1.9014867441
N17     -1.7375531719      1.5560328226      1.5017017109
H18     -0.7409971885      1.4479194262      1.6122276066
C19     -2.2241038647      2.6432777481      0.6765655452
H20     -3.1550990294      3.0043494661      1.1209929926
C21     -1.2149627060      3.7985118345      0.6796368706
H22     -1.5760511831      4.5268328990      -0.0470233784
C23     -1.0700131174      4.4230985880      2.0583151832
H24     -0.7076706160      3.6890693875      2.7808560264
H25     -0.3560936652      5.2459289128      2.0124468610
H26     -2.0299932996      4.8090276845      2.4074138401
O27     0.0769121840      3.3144532596      0.2586643955
H28     0.3522715737      3.7976960762      -0.5453520381
C29     -2.6421090330      2.2462390632      -0.7487616557
O30     -3.1271299917      3.1084412504      -1.4809494244
N31     -2.5128767160      0.9453626067      -1.0779900187
H32     -2.0326583310      0.3036396509      -0.4515523012
C33     -3.0801058619      0.4080048162      -2.2958354014
H34     -3.3693001728      1.2384908989      -2.9386079813
H35     -2.3438559140      -0.2037484075      -2.8213077033
C36     -4.3110826163      -0.4741633677      -2.0947994183
O37     -4.8019168805      -1.0513783445      -3.0769294807
N38     -4.8006236810      -0.6098422385      -0.8499575495
H39     -4.3684040259      -0.1055711243      -0.0815276048
C40     -5.8400118530      -1.5921946864      -0.5301743617
H41     -5.7074792993      -2.4173810027      -1.2347536341
C42     -5.6745339209      -2.0803394862      0.8991934249
H43     -5.6805767868      -1.2368421397      1.5899106795
H44     -6.5034946391      -2.7373993542      1.1573207240
H45     -4.7361066814      -2.6283378918      0.9897872611
C46     -7.2537270468      -1.0252124085      -0.7665402708
O47     -8.0692639831      -0.8631018059      0.1387582992
N48     -7.5305664513      -0.7629943010      -2.0612031942
H49     -6.7867043852      -0.8872139661      -2.7388495142
C50     -8.8233999812#      -0.2272999962#      -2.4426999948#
H51     -8.9874146888      0.7529088330      -1.9916266227
C52     -2.3078999844#      5.2718999909#      -4.0404999819#
H53     2.9721077557      4.8228450649      -4.7772559272
C54     1.7856336284      4.2608693900      -3.0128739386
O55     1.0420390044      4.6270182607      -2.0952201730
N56     2.1523716776      2.9682815601      -3.1838096455
H57     2.8342431108      2.7457189365      -3.8912338076
C58     1.6840920168      1.8564162652      -2.3462260508
```



|      |               |                |               |
|------|---------------|----------------|---------------|
| H59  | 0.8145118531  | 2.2090187425   | -1.7989279263 |
| C60  | 1.2765152247  | 0.6715872952   | -3.2241818257 |
| H61  | 0.5824285619  | 1.0042496231   | -3.9966281080 |
| H62  | 2.1613166061  | 0.2533750777   | -3.7137672793 |
| C63  | 0.6223623925  | -0.4530629010  | -2.4125920351 |
| O64  | 0.8229805939  | -0.4654121428  | -1.1748640963 |
| O65  | -0.0641612555 | -1.2920299239  | -3.0697107965 |
| C66  | 2.8083677261  | 1.4631945864   | -1.3711494793 |
| O67  | 3.8567813613  | 0.9634008940   | -1.7893465150 |
| N68  | 2.5789840736  | 1.7403419712   | -0.0734963499 |
| H69  | 1.6358457149  | 2.0158019402   | 0.1722534032  |
| C70  | 3.5368602277  | 1.4780379776   | 0.9947126401  |
| H71  | 4.5033866242  | 1.9023269503   | 0.7177565430  |
| C72  | 3.0336381371  | 2.1938704614   | 2.2706877722  |
| H73  | 2.0563784101  | 1.7713674607   | 2.5430791359  |
| C74  | 3.9858967653  | 2.0624765069   | 3.4432764824  |
| H75  | 4.9544529221  | 2.4881494668   | 3.1762239210  |
| H76  | 3.5715008235  | 2.6218618405   | 4.2815890906  |
| H77  | 4.1323186856  | 1.0228170841   | 3.7244445724  |
| O78  | 2.8965946094  | 3.5906365508   | 2.0136651267  |
| H79  | 2.1178122648  | 3.7398954925   | 1.4611062776  |
| C80  | 3.7868272248  | -0.0227801406  | 1.2267638863  |
| O81  | 4.7665722572  | -0.4062484446  | 1.8654886519  |
| N82  | 2.8833507656  | -0.8653241445  | 0.6816117491  |
| H83  | 2.1351362438  | -0.5226700459  | 0.0812075894  |
| C84  | 3.1046187991  | -2.2911366633  | 0.7177751208  |
| H85  | 3.3854285261  | -2.6066039459  | 1.7218684846  |
| H86  | 2.1816138984  | -2.7965122193  | 0.4350396370  |
| C87  | 4.2189374612  | -2.7973874370  | -0.1946480468 |
| O88  | 4.5749482416  | -3.9800141898  | -0.0983981506 |
| N89  | 4.7719264585  | -1.9206961072  | -1.0488423821 |
| H90  | 4.4464071080  | -0.9592547529  | -1.0639555511 |
| C91  | 5.9636446798  | -2.2344696713  | -1.8398839875 |
| H92  | 5.8768453472  | -3.2785934410  | -2.1473059043 |
| C93  | 6.0482977828  | -1.3084761684  | -3.0403016486 |
| H94  | 6.1194267529  | -0.2724159989  | -2.7117165569 |
| H95  | 6.9375386375  | -1.5435364695  | -3.6241029915 |
| H96  | 5.1590702472  | -1.4271837071  | -3.6602646612 |
| C97  | 7.2048093759  | -2.0930643527  | -0.9320817486 |
| O98  | 8.0260615171  | -1.1886034279  | -1.0567528148 |
| N99  | 7.2768849370  | -3.0496905628  | 0.0214217082  |
| H100 | 6.4783721807  | -3.6687885652  | 0.1056100013  |
| C101 | 8.1583999932# | -2.8908999984# | 1.1619999978# |
| H102 | 7.8748931885  | -2.0187373019  | 1.7553175315  |
| H103 | -8.8562535658 | -0.1382578887  | -3.5265465691 |
| H104 | -9.6197264590 | -0.8916616967  | -2.1055148189 |
| H105 | -2.3655873021 | 2.0735036198   | 6.7626362531  |
| H106 | -1.3419818103 | 0.7445729389   | 7.3084421257  |
| H107 | 8.0937088584  | -3.7861635356  | 1.7771250724  |
| H108 | 9.1848773496  | -2.7586964731  | 0.8218933448  |
| H109 | 1.4435111082  | 5.7081390766   | -4.5392550232 |
| H110 | 2.8288337061  | 6.0618146307   | -3.5022183293 |
| H111 | -1.8238899350 | -3.9142146171  | -0.1237939270 |
| C112 | -0.5923289577 | -2.9468213881  | -1.8754313991 |
| C113 | -2.0043464965 | -3.2183979688  | -2.0606217385 |
| H114 | -0.3017811411 | -2.3499366862  | -1.0276102204 |
| H115 | -2.6939391134 | -2.5158939157  | -1.6040654300 |
| O116 | -1.5640383065 | -4.2453385373  | -1.1431754198 |
| H117 | 0.1260004854  | -3.5111421428  | -2.4427509406 |
| H118 | -2.3403349401 | -3.6271156365  | -3.0063537817 |

&
